# Supplementary material for: N-doped CNTs wrapped sulfur-loaded hierarchical porous carbon cathode for Li–sulfur battery studies
Source: Royal Society of Chemistry journal article supplement (doi:10.1039/d3ra08507d), 2024-01-01
Supplement: d3ra08507d1.pdf [file d3ra08507d1.pdf]

## Supporting information

### **N-doped CNTs Wrapped Sulfur-Loaded Hierarchical Porous Carbon Cathode for for Li-Sulfur Battery Studies**

Arunakumari Nulu, Venugopal Nulu, Keun Yong Sohn\*

Department of Nanoscience and Engineering, Center for Nano Manufacturing, Inje University,  
197 Inje-ro, Gimhae, Gyeongnam-do 50834, Republic of Korea

\*Corresponding author, E-mail address: [ksohn@inje.ac.kr](mailto:ksohn@inje.ac.kr)

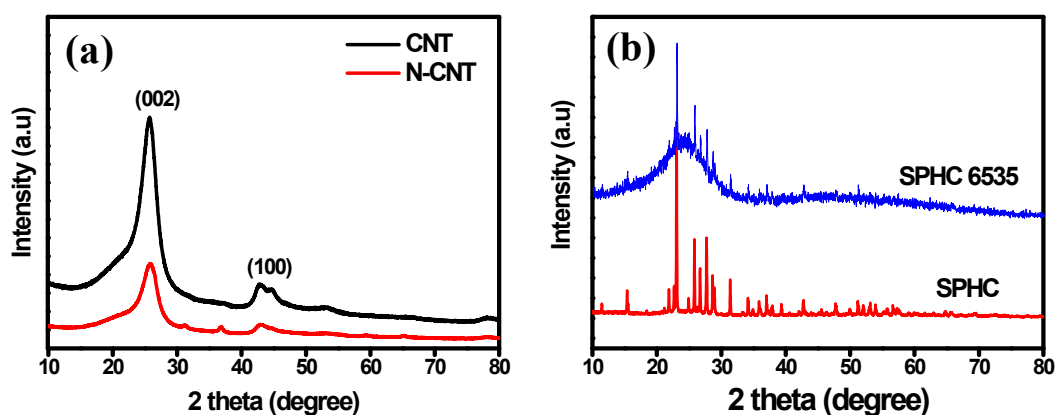

Fig. S1. XRD patterns (a) CNT and N-doped CNTs (b) SHPC and SHPC 6535.

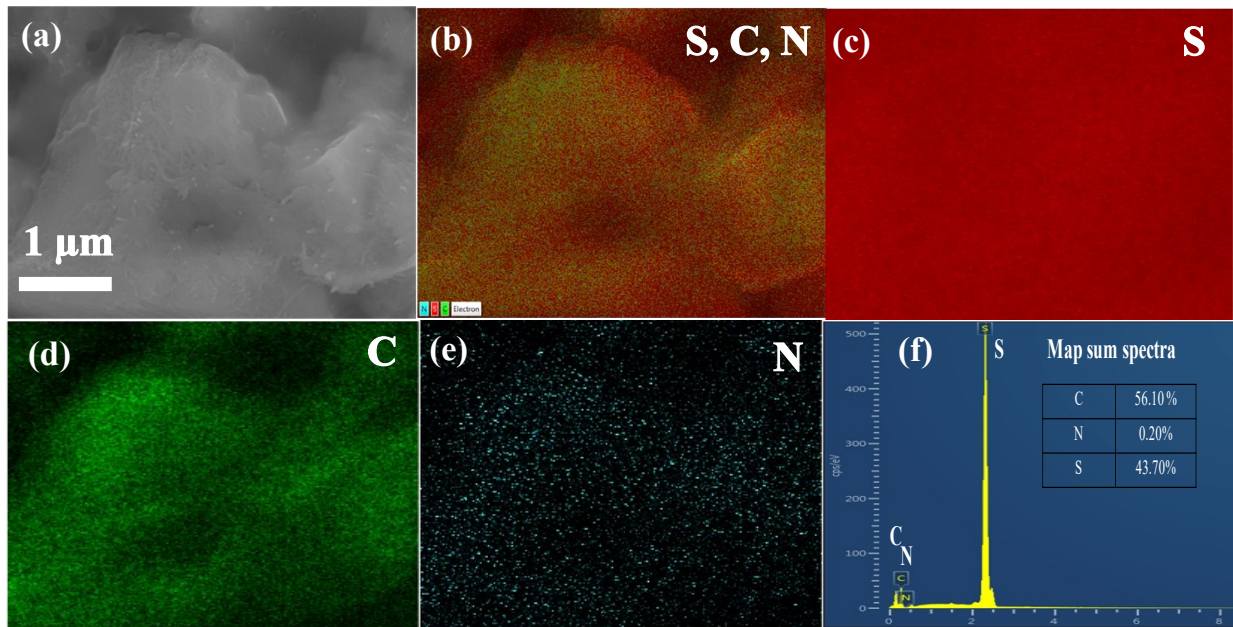

Fig. S2. Elemental analysis mapping by SEM-EDX of SHPC-NCNT (a) SEM image (b) EDX element layered Image (c) S mapping (d) C mapping (e) N-mapping (f) Corresponding SEM-EDX spectra of SHPC-NCNT.

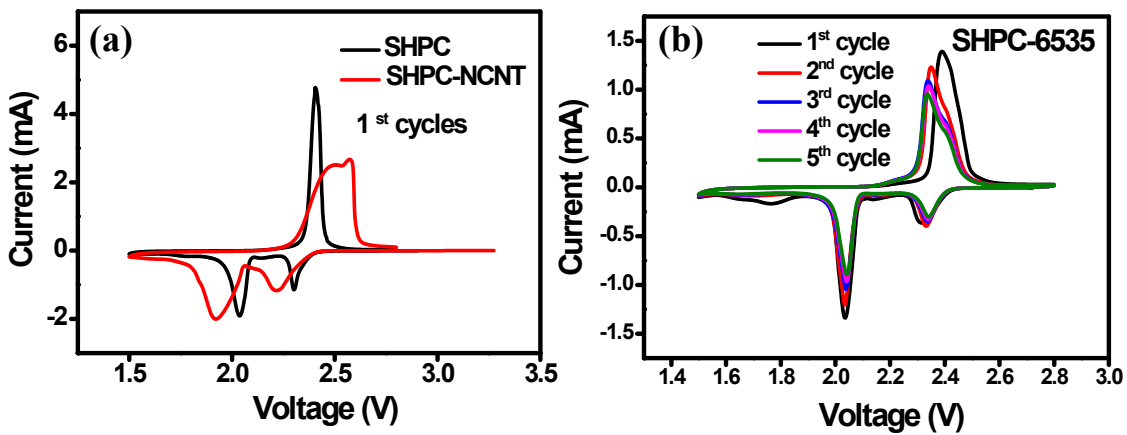

Fig. S3. Cyclic voltammograms (a) First cycles of SHPC and SHPC-NCNT (b) SHPC-6535.

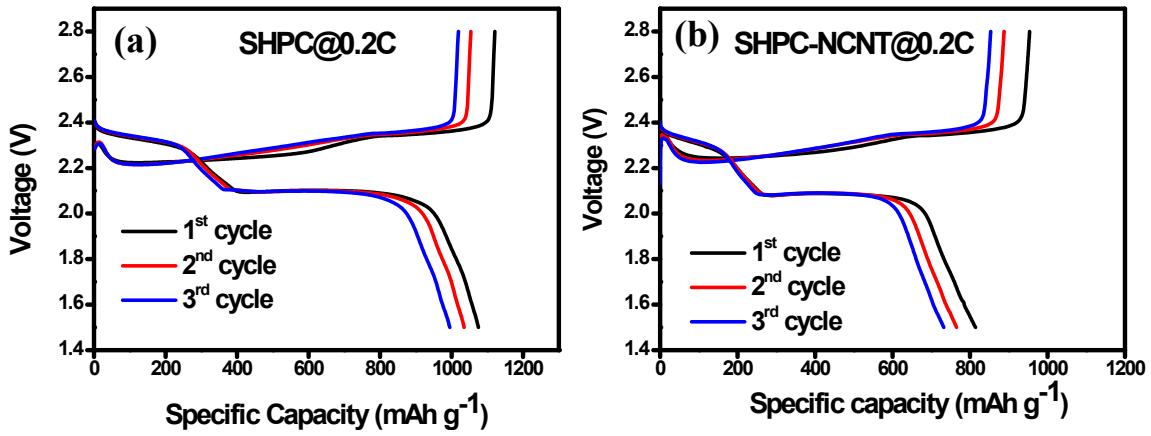

Fig. S4. Specific capacity vs. voltage plots for the first three cycles (a) SHPC at 0.2 C (b) SHPC-

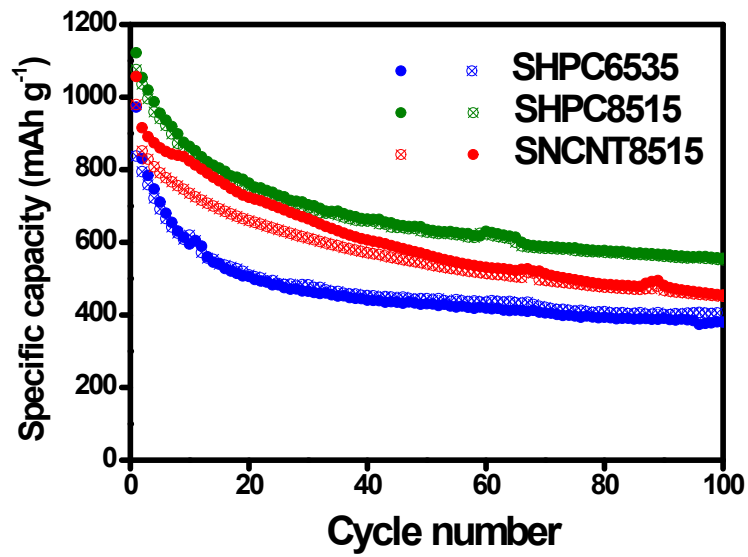

NCNT at 0.2 C.

Fig. S5. Cylability results of SHPC6535, SHPC8515, and SNCNT8515 materials.

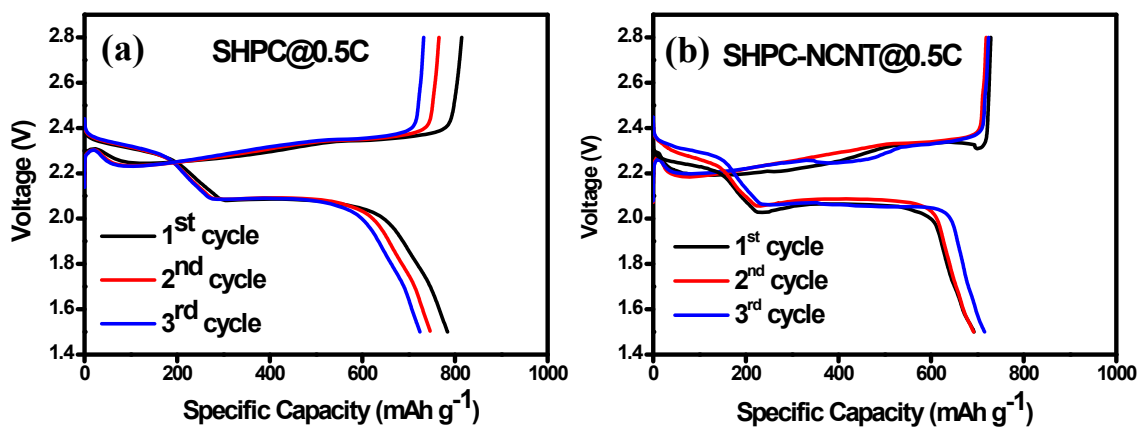

Fig. S6. Specific capacity vs. voltage plots for the first three cycles (a) SHPC at 0.5 C (b) SHPC-

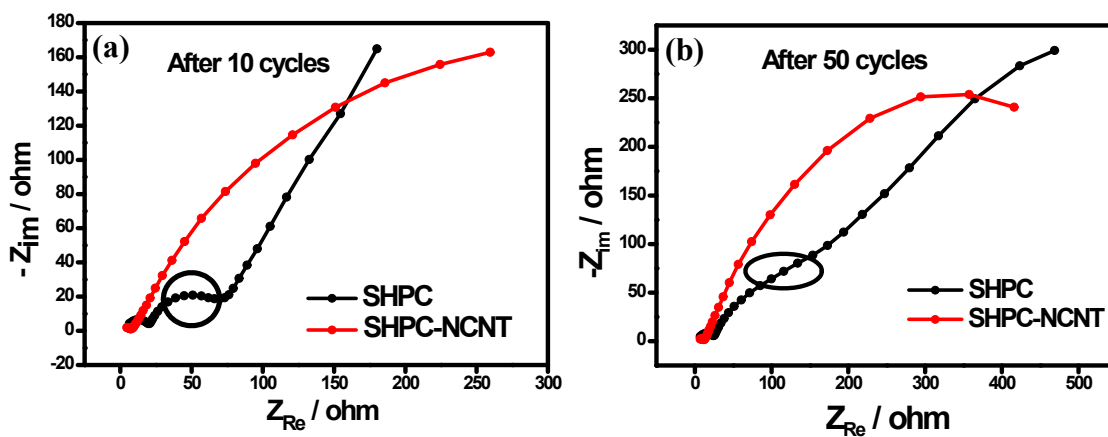

NCNT at 0.5 C.

Fig. S7. EIS Spectra of SHPC and SHPC-NCNT electrodes (b) after 10 cycles (c) after 50 cycles.

Table S1. Comparison of electrochemical performance of biomass-derived carbons and other porous carbons as sulfur cathode host.

| Host material                                        | Applied current        | Cycle life | Specific capacity after cycling | Capacity retention (vs. 2 <sup>nd</sup> cycle) | Ref. |
|------------------------------------------------------|------------------------|------------|---------------------------------|------------------------------------------------|------|
| <b>Biomass-derived carbon hosts</b>                  |                        |            |                                 |                                                |      |
| Nano-porous carbon beads                             | 0.1 C                  | 100        | 480 mAh g <sup>-1</sup>         | ~70.5%                                         | 1    |
| Porous ramie Carbon/MWCNT                            | 0.1 C                  | 500        | 812 mAh g <sup>-1</sup>         | ~62.0%                                         | 2    |
| Honeycomb-derived N-doped hierarchical porous carbon | 1 C                    | 500        | 350 mAh g <sup>-1</sup>         | ~69.0%                                         | 3    |
| Mango-stone-derived porous carbon                    | 800 mA g <sup>-1</sup> | 500        | 526 mAh g <sup>-1</sup>         | ~61.8%                                         | 4    |
| Rice straw-derived CoO-embedded porous carbon host   | 1 C                    | 800        | 412 mAh g <sup>-1</sup>         | ~46.0%                                         | 5    |
| biomass silkworm feces derived porous carbon         | 3 C                    | 1000       | 641 mAh g <sup>-1</sup>         | ~54.0%                                         | 6    |
| Corn-cob-derived activated carbon                    | 0.3 C                  | 200        | 799 mAh g <sup>-1</sup>         | ~60.9%                                         | 7    |
| Hair-derived porous carbon                           | 0.5 C                  | 300        | 870 mAh g <sup>-1</sup>         | ~82.0%                                         | 8    |
| waste tea-based porous carbons                       | 0.05 C                 | 100        | 627 mAh g <sup>-1</sup>         | ~59.7%                                         | 9    |
| Yam derived carbon                                   | 1 C                    | 450        | 401 mAh g <sup>-1</sup>         | ~48.6%                                         | 10   |

| Other porous carbon hosts                                            |                        |     |                         |        |           |
|----------------------------------------------------------------------|------------------------|-----|-------------------------|--------|-----------|
| Multi porous carbon                                                  | 200 mA g <sup>-1</sup> | 70  | 500 mAh g <sup>-1</sup> | ~35.7% | 11        |
| N-doped porous carbon                                                | 0.5 C                  | 400 | 571 mAh g <sup>-1</sup> | ~71.7% | 12        |
| G/CNT hybrids                                                        | 1 C                    | 100 | 530 mAh g <sup>-1</sup> | ~58.8% | 13        |
| Porous carbon                                                        | 0.2 C                  | 200 | 446 mAh g <sup>-1</sup> | ~55.7% | 14        |
| N-doped porous carbon                                                | 0.1 C                  | 239 | 502 mAh g <sup>-1</sup> | ~54.2% | 15        |
| Interconnected Micro/meso porous carbon                              | 0.1 C                  | 100 | 700 mAh g <sup>-1</sup> | ~57.3% | 16        |
| This work                                                            | 0.2 C                  | 150 | 664 mAh g <sup>-1</sup> | 74.8%  | This work |
| Spent coffee waste-derived hierarchical porous carbon (HPC)/ N-MWCNT | 0.5 C                  | 150 | 532 mAh g <sup>-1</sup> | 73.9%  |           |

#### References:

1. S. Choudhury, B. Krüner, P. M. Balleste, A. Tolosa, C. Prehal, I. Grobelsek, O. Paris, L. Borchardt, V. Presser, *J Power Sources*, 2017, 357, 198–208.
2. L. Han, Z. Li, Y. Feng, L. Wang, B. Li, Z. Lei, W. Wang, W. Huang, *Processes*, 2022, 10(1), 136.
3. H. Li, Z. Zhao, Y. Li, M. Xiang, J. Guo, H. Bai, X. Liu, X. Yang, C. Su, *Dalton Trans.*, 2022, 51, 1502–1512.
4. S. Zhang, M. Zheng, Z. Lin, R. Zang, Q. Huang, H. Xue, J. Cao, and H. Pang, *RSC Adv.*, 2016, 6, 39918–39925.
5. J. Wang, L. Wu, L. Shen, Q. Zhou, Y. Chen, J. Wu, Y. Wen, J. Zheng, *J Colloid Interface Sci.* 2023, 15(640), 415–422.
6. M. Ren, X. Lu, Y. Chai, X. Zhou, J. Ren, Q. Zheng, D. Lin, *J Colloid Interface Sci.*, 2019, 552(15) 91–100.

7. B. Li, M. Xie, G. Yia and C. Zhang, *RSC Adv.*, 2020,10, 2823–2829.
8. M. Yu, R. Li, Y. Tong, Y. Li, C. Li, J. D. Hong and G. Shi, *J. Mater. Chem. A*, 2015, 3, 9609–9615.
9. A. A. Arie, H Kristianto, E. C. Cengiz and R. D. Cakan, *Ionics*, 26, pages201–212 (2020).
10. J. M. Chabu, Y. Li, and Y. N. Liu, *ChemNanoMat*, 2018, 5(5), 612–618.
11. C.-H. Hsu, C.-H. Chung, T.-H. Hsieh, H.-P. Lin, *Int. J. Mol. Sci.* 2022, 23(1), 39.
12. S. Wang, K. Zou, Y. Qian, Y. Deng, L. Zhang, G. Chen, *Carbon*, 2019, 144, 745–755.
13. M.-Q. Zhao, X.-F. Liu, Q. Zhang, G.-L. Tian, J.-Q. Huang, W. Zhu, and F. Wei, *ACS Nano.*, 2012, 6, 10759–10769.
14. Z. Zhao, W. Yin, H. Li, Y. Jiao, D. Lei, Y. Li, J. Guo, W. Bai, M. Xiang, *Microporous and Mesoporous Materials*, 337, 2022, 111946.
15. S. Dörfler, P. Strubel, T. Jaumann, E. Troschke, F. Hippauf, C. Kensy, A. Schökel, H. Althues, L. Giebeler, S. Oswald, S. Kaskel, *Nano Energy*, 2018, 54,116–128.
16. Y.-C. Ko, C.-H. Hsu, C.-AnLo, C.-M. Wu, H.-L. Yu, C.-H. Hsu, H.-P. Lin, C.-Y. Mou, H.-L. Wu, *ACS Sustainable Chem. Eng.* 2022, 10, 14, 4462–4472.
